# Supplementary material for: The effect of lithology on the relationship between denudation rate and chemical weathering pathways – evidence from the eastern Tibetan Plateau
Source: Copernicus journal article supplement (doi:10.5194/esurf-10-513-2022), 2022-06-07
Supplement: Supplementary file 1 [file esurf-10-513-2022-supplement.zip]

Archive with 2 entries (2 files):
- Sichuan_DataTables_V4.xlsx
- esurf-10-513-2022-supplement-title-page.pdf
