# Supplementary material for: The effect of lithology on the relationship between denudation rate and chemical weathering pathways – evidence from the eastern Tibetan Plateau
Source: Copernicus journal article supplement (doi:10.5194/esurf-10-513-2022), 2022-06-07
Supplement: Supplementary file 1 [file esurf-10-513-2022-supplement.zip › esurf-10-513-2022-supplement-title-page.pdf]

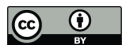

*Supplement of*

**The effect of lithology on the relationship between denudation rate and chemical weathering pathways – evidence from the eastern Tibetan Plateau**

**Aaron Bufe et al.**

*Correspondence to:* Aaron Bufe ([aaronbufe@gmail.com](mailto:aaronbufe@gmail.com))

- [esurf-10-513-2022-supplement-title-page.pdf](#)
- [Sichuan\\_DataTables\\_V4.xlsx](#)

The copyright of individual parts of the supplement might differ from the article licence.
