# Supplementary material for: The effect of lithology on the relationship between denudation rate and chemical weathering pathways – evidence from the eastern Tibetan Plateau
Source: Copernicus journal article supplement (doi:10.5194/esurf-10-513-2022), 2022-06-07
Supplement: Supplementary file 1 [file Sichuan_DataTables_V4.xlsx]

## Sheet: Table 1 Endmembers
	Table 1. Input endmembers for mixing model
	Endmember	Na/Ca	± Na/Ca	Mg/Ca	± Mg/Ca	Cl/Ca	± Cl/Ca	Ca/Na	± Ca/Na	Mg/Na	± Mg/Na
	Silicate: Granite	3.05	1.53	0.59	0.28	0	0	0.41	0.2	0.25	0.19
	Silicate: Paleozoic metapelites	3.85	1.32	12.65	6.42	0	0	0.29	0.13	3.38	1.43
	Silicate: Flysch	1.49	0.81	2.06	1.1	0	0	0.72	0.34	1.31	0.01
	Silicate: Global	2.86	2.04	0.71	0.57	0	0	0.35	0.25	0.25	0.2
	Carbonate	0	0	0.038	0.006	0	0	-	-	-	-
	Cyclic	0.17	0.1	0.23	0.12	0.98	0.41	-	-	-	-
	Hotspring	Na/Ca	Na/Ca	Mg/Ca	Mg/Ca	Cl/Ca	Cl/Ca	-	-	-	-
		Q1*	Q3**	Q1*	Q3**	Q1*	Q3**
		10	156	0.6	9.5	2.6	50.6
	*First quartile
	**Second quartile

## Sheet: Table S1 basin characteristics
	Table S1. Sample and catchment information
	Sample name	Date	Time	Sample Location		Basin Characteristics							Sample data
				Latitude	Longitude	Lithology	Mean basin elevation	Basin Area	Mean annual precipitation†	Denudation rate		Denudation rate source*	Conductivity	pH	Temperature
				(°N)	(°E)		(m)	(km2)	(mm/yr)	(mm/yr)	± (mm/yr)		(µS/cm)		(°C)
24	S18-01	2018-05-15	15:30:00	31.2696	103.517	metamorphic (Precambrian)	2697.48	40	639	0.253	0.033	wbo424	242	8.092	16.6
25	S18-02	2018-05-16	09:25:00	31.5187	103.517	metamorphic (Paleozoic)	2833	18	487	0.189	0.022	§wbo501	226	8.249	10.5
1	S18-03	2018-05-16	15:45:00	31.0232	102.277	flysch	3560.93	9	418	0.121	0.013	wbo519	488	8.494	18.9
26	S18-04	2018-05-17	09:00:00	31.0287	101.864	metamorphic (Paleozoic)	4276.34	63	622	0.285	0.036	wbo653	103.5	7.862	10.5
27	S18-05	2018-05-17	11:00:00	30.9539	101.718	metamorphic (Paleozoic)	3651.36	21	411	0.201	0.023	wbo518	184.6	8.39	10.3
28	S18-06	2018-05-17	13:35:00	30.7326	102.003	metamorphic (Paleozoic)	3526.48	50	415	0.882	0.127	wbo523	175	8.29	15.5
29	S18-07	2018-05-17	15:30:00	30.6808	101.74	metamorphic (Paleozoic)	3958.38	14	656	0.384	0.057	wbo522	249	8.524	13.8
12	S18-08	2018-05-17	16:30:00	30.5472	101.626	granitic (Miocene)	4355	14	340	0.396	0.039	#GS28	60.2	7.95	8.9
33	S18-09	2018-05-17	17:00:00	30.5417	101.614	flysch	4214.59	28	671	0.236	0.032	wbo521	329	8.224	11.6
2	S18-11	2018-05-18	08:45:00	30.5689	101.527	flysch	4184.91	10	672	0.141	0.014	GS26	314	8.706	8.3
3	S18-12	2018-05-18	10:05:00	30.3343	101.52	flysch	3913.29	16	546	0.018	0.002	wbo545	97.1	8.145	14.5
4	S18-13	2018-05-18	11:50:00	30.3217	101.379	flysch	4272.35	61	472	0.038	0.014	wbo621	25.5	7.77	13.1
13	S18-14	2018-05-18	15:00:00	30.2708	101.531	granitic (Mesozoic)	4083.51	37	582	0.028	0.002	wbo302	43.6	8.062	17.3
5	S18-16	2018-05-18	16:15:00	30.1454	101.515	flysch	3805.32	12	746	0.035	0.013	wbo623	141.5	8.36	16.6
6	S18-17	2018-05-18	17:15:00	29.98	101.581	flysch	3972.17	63	617	0.036	0.003	wbo544	130.4	8.14	16.6
7	S18-18	2018-05-19	09:10:00	30.0365	101.219	flysch	4055.84	44	477	0.075	0.007	wbo538	133.8	8.337	8.2
8	S18-19	2018-05-19	09:55:00	30.0499	101.306	flysch	4261.17	5	376	0.093	0.036	wbo625	132.7	8.398	5.3
9	S18-20	2018-05-19	11:00:00	30.0541	101.367	flysch	4370.65	9	376	0.04	0.015	wbo626	72.1	8.12	10.5
14	S18-21	2018-05-19	11:50:00	29.9912	101.378	granitic (Mesozoic)	4378	7	441	0.023	0.009	wbo645	26.2	7.66	8
34	S18-22	2018-05-19	12:20:00	29.9329	101.386	granitic (47%)/flysch	4156.82	48	441	0.023	0.009	wbo645	63.4	8.54	14.2
35	S18-23	2018-05-19	13:10:00	29.9469	101.575	granitic (12%)/flysch	4206.22	735	461	0.035	0.015	§wbo544, wbo305	142.7	8.672	15.5
15	S18-24	2018-05-19	15:30:00	30.2461	101.775	granitic (Miocene)	4325.63	24	427	0.086	0.018	GS09	45.5	7.774	11.7
16	S18-25	2018-05-19	15:50:00	30.2632	101.781	granitic (Miocene)	4391.39	31	409	0.244	0.022	GS15	37.6	7.775	12.4
17	S18-26	2018-05-19	16:20:00	30.2638	101.814	granitic (Miocene)	4420.2	22	304	0.208	0.019	GS16	51.3	7.91	7.5
10	S18-27	2018-05-19	16:50:00	30.2718	101.869	flysch	4228.46	17	666	0.19	0.016	GS18	282	8.557	10.6
18	S18-28	2018-05-19	18:15:00	30.046	101.966	granitic (Precambrian)	4243.97	16	437	0.323	0.027	GS22	27.4	7.6	11.3
19	S18-29	2018-05-20	08:35:00	29.9027	101.95	granitic (Miocene)	4498.88	13	818	0.401	0.038	#GS11	45.2	7.525	4.7
20	S18-30	2018-05-20	09:00:00	29.8972	101.938	granitic (Miocene)	4576.18	31	430	0.515	0.045	GS10	39.1	7.551	8.4
21	S18-31	2018-05-20	11:30:00	29.7342	102.042	granitic (Miocene)	4302	93	1309	1.203	0.638	GS01	97.1	7.844	10.4
22	S18-32	2018-05-20	13:00:00	29.6912	101.984	granitic (Miocene)	4100	20	655	3.5	1	§GS41	98.2	7.91	10.6
36	S18-33	2018-05-20	13:25:00	29.6896	101.984	granitic (63%)/metamorphic	4798	152	525	7.531	2.388	GS37	173.7	8.159	10.3
37	S18-34	2018-05-20	15:00:00	29.6503	102.098	granitic (60%)/metamorphic	4303.72	72	926	2.487	0.388	wbo549	164.1	8.093	13.8
30	S18-35	2018-05-20	16:00:00	29.5443	102.135	metamorphic (Triassic)	2620.88	28	1339	0.923	0.199	wbo550	353	8.37	17.1
31	S18-36	2018-05-20	17:30:00	29.415	101.907	metamorphic (Triassic)	4468.54	37	340	1.778	0.196	GS38	267	8.317	12.8
38	S18-37	2018-05-20	18:00:00	29.3993	101.963	granitic (46%)/metamorphic	3680.35	10	583	1.599	0.204	GS39	149.6	8.226	12.6
11
23
32		*GS.. from Cook et al., 2018, wbo… from Ouimet et al., 2009.
		† from Bookhagen and Burbank (2010).
		§ erosion rate from neighboring catchment.
		#this manuscript.

## Sheet: S2 raw data
Table S3. Raw water chemistry data
Sample	Ba2+	± Ba2+	Ca2+	± Ca2+	Fe2+	± Fe2+	K+	± K+	Li+	± L+	Mg2+	± Mg2+	Mn2+	± Mn2+	Na+	± Na+	Si	± Si	Sr2+	± Sr2+	S6+	± S6+	F-	± F-	Cl-	± Cl-	NO3-	± NO3-	SO42-	± SO42-	DIC charge balance	± DIC
	(µmol/L)	(µmol/L)	(µmol/L)	(µmol/L)	(µmol/L)	(µmol/L)	(µmol/L)	(µmol/L)	(µmol/L)	(µmol/L)	(µmol/L)	(µmol/L)	(µmol/L)	(µmol/L)	(µmol/L)	(µmol/L)	(µmol/L)	(µmol/L)	(µmol/L)	(µmol/L)	(µmol/L)	(µmol/L)	(µmol/L)	(µmol/L)	(µmol/L)	(µmol/L)	(µmol/L)	(µmol/L)	(µmol/L)	(µmol/L)	(µmol/L)	(µmol/L)
S18-01	0.331733	0.118924	929.745	61.3632			54.2499	3.68899			90.5232	6.65883			145.483	11.3477	179.18	17.7388	1.64135	0.118177	483.424	36.7402	30.9197	1.44001	19.5935	0.424613	86.452	0.796527	474.494	19.4168	1158.26	117.774
S18-02	0.0855292	0.0306618	853.308	56.3183	0.215955	0.0360787	71.2539	4.84526			197.109	14.4992			68.6146	5.35194	82.176	8.13543	1.66111	0.1196	308.405	23.4388	3.08184	0.50246	15.3732	0.274916	33.3864	0.558451	310.762	15.4586	1571.26	112.355
S18-03			1097.67	72.4464			18.8529	1.28199			1310.62	96.4081			339.791	26.5037	110.055	10.8954	2.31449	0.166643	543.556	41.3103			113.345	1.73375	16.9935	0.154858	536.084	23.6999	3977.35	237.963
S18-04	0.12471	0.0447078	347.198	22.9151	0.233694	0.0390423	37.6852	2.56259			114.613	8.43085			44.621	3.48043	87.2924	8.64195	0.503429	0.0362469	132.23	10.0495			4.32309	0.0906269	9.12992	0.254318	125.847	1.34182	742.503	48.9504
S18-05	0.287292	0.102993	815.43	53.8184			60.9149	4.14221			84.2194	6.19513			32.7308	2.553	80.6169	7.98107	0.844588	0.0608103	101.57	7.71933			3.9818	0.218346	10.9736	0.147802	98.9657	1.06472	1682.32	108.436
S18-06	0.249305	0.0893746	700.838	46.2553			66.1109	4.49554			145.639	10.7131			35.8572	2.79686	57.6175	5.70413	1.41024	0.101538	215.096	16.3473			6.16685	0.181626	13.6718	0.270875	211.04	7.28369	1356.32	93.9846
S18-07	0.0870454	0.0312053	828.943	54.7103			38.4596	2.61526			402.408	29.6009			66.6444	5.19827	80.7449	7.99375	2.47095	0.177908	305.819	23.2422			3.38194	0.295979	11.4394	0.333572	303.861	14.3237	1950.38	121.206
S18-08			251.275	16.5842			8.7986	0.598305			19.4488	1.43064			58.4458	4.55877	103.147	10.2116	0.589293	0.0424291	12.0434	0.915301	97.6845	4.69789	3.63392	0.148032	12.2961	0.276259	12.9575	0.617949	470.341	33.2532
S18-09	0.106312	0.0381122	1003.33	66.2201	0.572275	0.0956074	51.1205	3.47619	3.07468	0.187556	577.843	42.5058	0.131172	0.00341047	313.541	24.4562	116.16	11.4999	1.96578	0.141536	128.837	9.79158	19.3943	1.72553	17.5303	4.05366	8.71092	0.167703	125.027	1.35346	3239.95	159.22
S18-11			854.908	56.4239			6.59528	0.448479			787.856	57.9542			85.6126	6.67778	110.979	10.987	1.98122	0.142648	48.402	3.67856			3.29356	0.129759	6.57335	0.191827	49.7001	4.55268	3272.43	161.652
S18-12			233.36	15.4018	11.0496	1.84602	18.0642	1.22836			192.131	14.133	0.953195	0.0247831	151.001	11.7781	116.102	11.4941	0.459589	0.0330904	15.32	1.16432	3.3487	0.550523	9.02415	0.158417			16.5711	0.523493	999.457	43.5921
S18-13			59.4274	3.20908	0.340277	0.0552172	13.4567	1.04962	0.95458	0.065866	16.2439	1.67883	0.0251926	0.00151156	89.8166	8.80203	117.407	9.86222	0.158677	0.0139635	10.238	0.368566			5.16646	0.114552	5.74632	0.124962	12.258	0.523465	221.19	11.399
S18-14			125.464	6.77507	0.694921	0.112766	21.3721	1.66702	0.241918	0.0166924	25.8489	2.67152	0.0869351	0.0052161	116.345	11.4018	221.526	18.6082	0.267838	0.0235697	2.43884	0.0877982			12.7951	0.316418	1.96114	0.136701			427.928	18.5706
S18-16			430.822	28.4343	0.187038	0.0312476	10.4083	0.707767			246.296	18.1174			110.638	8.6298	113.531	11.2396	0.544974	0.0392381	31.1744	2.36925			4.13599	0.150774			29.6092	0.589681	1413.39	67.9747
S18-17			384.375	25.3688	0.327727	0.0547519	19.6032	1.33302			202.209	14.8744			142.318	11.1008	98.7013	9.77143	0.519736	0.037421	45.176	3.43338	3.25027	0.361027	10.98	0.267543			46.8395	4.70153	1228.88	59.1244
S18-18			374.518	24.7182			12.887	0.876319			251.505	18.5005			116.416	9.08041	130.945	12.9635	0.584283	0.0420684	35.7728	2.71873			3.4769	0.304998			34.1902	0.706552	1310.66	62.4033
S18-19			413.812	27.3116			3.62928	0.246791			236.452	17.3933			64.8837	5.06092	91.1053	9.01942	0.579674	0.0417365	33.1566	2.5199							32.9046	0.610634	1304.39	64.946
S18-20			227.559	15.0189	0.406686	0.0679433	3.35603	0.22821			116.794	8.59132			47.2507	3.68555	64.944	6.42946	0.309048	0.0222514	21.5656	1.63899							20.6036	0.535825	699.538	34.7853
S18-21			89.4141	4.82836			16.343	1.27475			11.1777	1.15523			41.8548	4.10177	123.595	10.3819	0.112014	0.0098572	3.24328	0.116758					3.92453	0.109767			255.681	10.818
S18-22			206.97	13.66			22.2064	1.51003			54.0662	3.97708			93.7406	7.31177	114.093	11.2952	0.295555	0.0212799	19.1936	1.45871			4.58635	0.0739308			19.2853	0.643569	595.454	29.3894
S18-23			464.291	30.6432			23.239	1.58025			208.397	15.3295			86.3997	6.73918	74.1547	7.34131	0.564884	0.0406716	62.9069	4.78093			4.23659	0.183255			63.6114	3.56267	1324.68	68.5063
S18-24			158.19	8.54224	0.207086	0.0336042	7.85747	0.612883	0.524673	0.0362024	8.08097	0.835177			105.126	10.3024	130.943	10.9992	0.295812	0.0260314	11.3613	0.409008	100.005	0.613889	3.2033	0.196239	9.70689	0.14551	13.5335	0.624638	307.073	19.9799
S18-25			144.714	7.81456	0.059138	0.00959641	6.5789	0.513154	0.388076	0.0267772	5.57418	0.576098			48.0279	4.70673	86.3054	7.24965	0.245938	0.0216425	8.00229	0.288082	85.3826	0.42077	3.44212	0.0704783	14.8311	0.232944	10.5466	0.585256	231.433	16.3221
S18-26			194.268	10.4905			7.26078	0.566341	0.26882	0.0185485	14.2746	1.4753			55.6782	5.45646	77.4446	6.50534	0.988711	0.0870066	51.8721	1.86739	38.1335	0.982564	4.96079	0.144292	15.5917	0.265297	51.2463	0.713365	321.092	21.816
S18-27			689.882	45.5322			5.53506	0.376384			749.166	55.1082			55.4978	4.32883	73.5823	7.28465	1.49343	0.107527	100.874	7.66642			4.52092	1.93354	8.97053	0.182509	98.4306	1.18034	2731.76	143.003
S18-28	0.0302297	0.00385565	78.9838	4.26513	0.0579202	0.0093988	7.87487	0.61424			24.2383	2.50506			39.2312	3.84465	62.8634	5.28052	0.187535	0.0165031	44.1348	1.58885			3.59518	0.147546	6.1643	0.132658	43.1829	0.732087	157.977	10.5282
S18-29			161.598	8.72629	0.0592309	0.00961148	11.2022	0.873774	0.137659	0.00949844	21.5369	2.22587			30.9454	3.03265	56.0088	4.70474	0.553094	0.0486723	65.5762	2.36074	7.09709	0.884627	4.14521	0.14236	21.3943	0.296164	63.8869	0.794457	249.369	18.1925
S18-30			141.091	7.61893			7.19594	0.561284	0.190017	0.0131112	13.6171	1.40735			51.8162	5.07799	82.176	6.90279	0.433254	0.0381264	24.314	0.875304	42.6331	1.40373	4.17962	0.105791	19.5536	0.366015	25.3143	0.551899	252.491	16.2138
S18-31			351.335	23.1881	0.306553	0.0512145	28.7116	1.95239	1.72951	0.1055	46.8608	3.44705	0.155807	0.00405098	121.923	9.51001	101.524	10.0509	0.822039	0.0591868	69.7682	5.30239	20.3859	1.95095	9.45872	0.15043	12.4428	0.230092	67.5836	1.06776	773.871	47.7926
S18-32			397.563	26.2392			18.2096	1.23825			45.4524	3.34345			41.8688	3.26577	68.6292	6.79429	0.596233	0.0429288	89.8482	6.82847	44.3722	1.0828	5.58655	0.108468	12.3369	0.174841	86.631	1.04407	711.744	52.9653
S18-33			646.088	42.6418	0.495398	0.082764	64.2718	4.37048			120.057	8.83134	0.180292	0.00468758	47.4891	3.70415	53.345	5.28115	0.981684	0.0706813	320.651	24.3695	16.0838	1.95383	5.48444	0.114828	11.2862	0.153466	309.647	2.93808	995.217	87.0617
S18-34	0.0743658	0.0266597	617.698	40.7681	0.304256	0.0508307	69.5917	4.73224			114.327	8.40981			32.7342	2.55327	62.6468	6.20203	0.630817	0.0454188	267.175	20.3053					10.7365	0.205805	268.449	2.52642	1020.76	83.2731
S18-35	0.26735	0.0958435	1348.5	89.0012			254.426	17.301			259.034	19.0544			68.1464	5.31542	107.439	10.6364	2.83335	0.204001	767.319	58.3162			3.19155	0.162499	8.23967	0.0956921	740.973	5.56935	2050.47	182.595
S18-36			1047.35	69.1253			88.0418	5.98684			180.854	13.3035			43.0681	3.35931	60.0112	5.94111	1.54313	0.111105	612.913	46.5814			3.80574	0.203417	16.0536	0.469465	589.83	4.42934	1391.09	140.676
S18-37	0.105141	0.0376925	619.313	40.8747			77.9016	5.29731			42.3462	3.11496			45.5319	3.55149	92.3638	9.14402	1.26713	0.091233	195.795	14.8804	4.99305	0.722184			10.3198	0.192615	191.963	2.58429	1050.26	82.0683

## Sheet: S3 bedrock
Table S4. Bedrock chemistry
Sample	Lithology Group	Lithology	Reference	SiO2	Al2O3	CaO	Fe2O3	K2O	MgO	MnO	Na2O	P2O5	TiO2	LOI
				wt%	wt%	wt%	wt%	wt%	wt%	wt%	wt%	wt%	wt%	wt%
G-1	Granitoid	Mesozoic Plagiogranite	Jiang et al., 2018	64.6	16.1	4.5	4.5	1.9	1.9	0.1	4.1	0.1	0.4	1.6
G-2	Granitoid	Mesozoic Plagiogranite	Jiang et al., 2018	67	15	3.7	4.7	2	1.6	0.1	3.9	0.1	0.5	1.4
G-3	Granitoid	Mesozoic Plagiogranite	Jiang et al., 2018	62.7	18.1	4.9	4.8	1.4	1.6	0.1	4.9	0.2	0.6	0.2
G-4	Granitoid	Mesozoic Plagiogranite	Jiang et al., 2018	70.9	13.5	3.2	2.7	3.5	1.1	0.1	3.2	0.2	0.4	1.2
G-5	Granitoid	Mesozoic Plagiogranite	Jiang et al., 2018	75.6	12.9	1.7	1.3	3.5	0.4	0	3.5	0.1	0.2	0.5
G-6	Granitoid	Cenozoic Biotite Granite	Jiang et al., 2018	72.2	12.2	2.6	2.7	2	1.2	0.1	4	0.1	0.3	2.5
G-7	Granitoid	Cenozoic Biotite Granite	Jiang et al., 2018	68.6	12.8	3.5	4.3	2.3	1.7	0.1	2.5	0.1	0.6	3.3
G-8	Granitoid	Mesozoic Granite	Jiang et al., 2018	62.3	15.1	3.3	9.2	1.9	1.1	0.3	4.6	0.3	0.9	0.8
G-9	Granitoid	Mesozoic Granite	Jiang et al., 2018	70.7	14.3	1.2	3.4	2.5	1	0	4.7	0.1	0.4	1.5
G-10	Granitoid	Mesozoic Granite	Jiang et al., 2018	67.5	15.3	2.6	3.8	2.6	1.2	0.1	4.9	0.1	0.5	0.8
G-11	Granitoid	Mesozoic Granite	Jiang et al., 2018	64.7	14.2	3	4.3	3.5	1.9	0.1	2.2	0.1	0.5	5.2
G-12	Granitoid	Granite outside of study area	Jiang et al., 2018	73.9	13.1	1.4	2.5	4.7	0.4	0.1	2.9	0.1	0.3	0.8
G-13	Granitoid	Granite outside of study area	Jiang et al., 2018	72.3	13.5	1.6	3	4.8	0.4	0.1	3	0.1	0.3	1
G-14	Granitoid	Granite outside of study area	Jiang et al., 2018	69.6	14.8	1.8	3.6	4.9	0.5	0.1	3.4	0.1	0.4	1.3
G-15	Granitoid	Granite outside of study area	Jiang et al., 2018	72.1	13.7	1.1	3.1	5	0.5	0.1	3.2	0.1	0.4	1.1
G-16	Granitoid	Granite outside of study area	Jiang et al., 2018	63.7	15.7	3.9	5.5	3.6	2.3	0.1	2.9	0.2	0.7	1.6
G-17	Granitoid	Granite outside of study area	Jiang et al., 2018	74.9	12.6	1.2	2.2	4.9	0.3	0.1	3	0.1	0.2	0.8
G-18	Granitoid	Granite outside of study area	Jiang et al., 2018	72.2	15.1	1.3	0.8	5.6	0.1	0	3.1	0	0.1	1.8
G-19	Granitoid	Granite outside of study area	Jiang et al., 2018	65.9	15.7	2.2	4.8	4.3	1.9	0.1	3.2	0.2	0.7	1.5
W129	Paleozoic Metamorphic	Quartzite - schist (Grt-St grade)	Weller et al., 2013	60.5	19.33	0.44	7.26	5.17	3.15	0.04	0.43	0.07	0.78	2.47
W122	Paleozoic Metamorphic	Devonian Quartzite (St grade)	Weller et al., 2013	54.7	23.06	0.6	9.33	4.25	3.49	0.09	1.04	0.09	1.01	1.94
W119	Paleozoic Metamorphic	Silurian Schist & Meta-marl (St grade)	Weller et al., 2013	59.66	19.54	0.19	7.65	4.95	3.23	0.08	0.63	0.09	0.74	2.9
W120	Paleozoic Metamorphic	Silurian Schist & Meta-marl (Ky grade)	Weller et al., 2013	61.84	18.51	0.39	7.7	4.53	3.15	0.1	0.81	0.06	0.7	1.81
W112	Paleozoic Metamorphic	Silurian Schist & Meta-marl (Ky grade)	Weller et al., 2013	56.59	22.74	0.31	7.59	4.93	3.23	0.07	0.82	0.12	0.96	2.25
W126	Paleozoic Metamorphic	Silurian Schist & Meta-marl (Ky-Sil grade)	Weller et al., 2013	62.87	17.75	0.95	6.53	3.71	2.78	0.07	1.88	0.1	0.67	2.3
W110	Paleozoic Metamorphic	Silurian Schist & Meta-marl (Sil grade)	Weller et al., 2013	58.79	20.11	0.29	8.16	5.15	3.55	0.07	0.63	0.08	1.02	1.75
M-1	Triassic Flysch	Songpan Ganze Flysch around Gongga	Jiang et al., 2018	58.3	12	7.4	10.5	1.3	4.7	0.2	2.7	0.2	1.9	0.3
M-2	Triassic Flysch	Songpan Ganze Flysch around Gongga	Jiang et al., 2018	52.5	17.3	8.5	9.9	1	4.8	0.2	2.7	0.2	0.9	1.4
W108	Triassic Flysch	Songpan Ganze Flysh (Bt grade)	Weller et al., 2013	59.19	15.63	6.3	6.37	2.98	3.14	0.1	1.47	0.13	0.62	3.76
GZ-47	Triassic Flysch	Upper Triassic Sandstone	Chen et al., 2007	48.64	15.29	10.18	0.45	3.04	3.65	0.09	1.09	0.15	0.69	8.92
GZ-72	Triassic Flysch	Upper Triassic Sandstone	Chen et al., 2007	69.45	6.93	7.42	1.07	1.04	1.82	0.1	1.52	0.11	0.39	7.97
GZ-83	Triassic Flysch	Upper Triassic Sandstone	Chen et al., 2007	63.57	6.86	11.18	0.16	1.19	2.23	0.06	1.09	0.11	0.41	10.34
GZ-51	Carbonate rich sediment	Carboniferous Sandstone	Chen et al., 2007	19.91	0.87	43.29	0	0.1	1.05	0.11	0	0.02	0.05	34.51
GZ-53	Carbonate rich sediment	Devonian Silt	Chen et al., 2007	34.67	3.68	27.56	0.47	1.23	0.84	0.18	0	1.41	0.15	28.72

## Sheet: S4 rain
Table S5. Rain chemistry data used for corrections. From Jiang et al., 2018
Sample	Ca2+	K+	Mg2+	Na+	Cl−	SO42-	Rain amount (weight)
	(µmol/L)	(µmol/L)	(µmol/L)	(µmol/L)	(µmol/L)	(µmol/L)	mm
P-1	10.6	2.2	1.7	1.5	14.1	24.5	4.2
P-2	15.3	1.7	4.7	2.2	14.2	20.2	4.6
P-3	5.2	1.8	1.3	1.7	14.3	17.8	0.4
P-4	17.6	1.7	3.7	1.7	2.5	37	1.4
P-5	18.4	3.2	3.7	5	7.7	43.7	2.4
P-6	12.8	1.1	2.4	1.6	14.6	25.4	3
P-7	9	2.6	2.4	1.7	14.4	58.8	4.2
Volume-weighted ratio with Cl-	1.02128	0.163964	0.236317	0.169266	1	2.6617
Ratio uncertainty	0.422609	0.072457	0.119487	0.10454	0.421667	1.48548

## Sheet: S5 hot springs
Table S6. Hotspring chemistry
Sample	Reference	Ca2+	K+	Mg2+	Na+	Cl−	SO42-
		(µmol/L)	(µmol/L)	(µmol/L)	(µmol/L)	(µmol/L)	(µmol/L)
S-1 High Flow Season	Jiang et al., 2018	1379.4	488.5	217.1	6091.8	1115.9	585.2
S-2 High Flow Season	Jiang et al., 2018	1022.4	368.4	192.6	5924.7	1267.2	30.8
S-3 High Flow Season	Jiang et al., 2018	740.8	221.5	590.7	11083	2364	140.9
S-4 High Flow Season	Jiang et al., 2018	93.9	1440	1158.1	23466.7	7070.5	0
S-5 High Flow Season	Jiang et al., 2018	143.9	1315.9	293.2	21177.4	7726.4	48.1
S-6 High Flow Season	Jiang et al., 2018	3166.5	993.1	1242.5	13908.5	6182.1	1429
S-1 Low Flow Season	Jiang et al., 2018	445.1	300.3	460.6	8052.9	1889.2	590.2
S-2 Low Flow Season	Jiang et al., 2018	254.4	165.3	330.6	4914.9	2118.7	343.9
S-3 Low Flow Season	Jiang et al., 2018	157.1	100.2	1050	10245.7	2373.3	392.6
S-4 Low Flow Season	Jiang et al., 2018	83	595.4	2611.4	21814.7	6550.2	0
S-5 Low Flow Season	Jiang et al., 2018	134.7	602	1693.5	22155	6401.5	298
S-6 Low Flow Season	Jiang et al., 2018	643.4	460.4	3055.1	14064.3	6215.2	926.1

## Sheet: S6 cosmo
Table S2. 10Be denudation rate data
Sample number	Location		Mean basin elevation	Basin relief	Quartz weight	Production rate*			10Be†§	Error (1σ)	Erosion rate	Error (1σ)
	latitude	longitude				(atoms/g*ys)			(x103 Atoms/g)	(x103 Atoms/g)
	(°N)	(°E)	(m)	(m)	(g)	spallation	muons	total			(mm/ky)	(mm/ky)
GS11	29.9027	101.95	4498.74	1706.69	30.7	50.6278	0.272828	50.9007	77.8222	3.72908	400.862	38.1622
GS28	30.5469	101.626	4355.17	1624.4	20.35	50.3475	0.275918	50.6234	78.4165	4.28988	396.212	39.1197
* Sea level high latitude production rate: 4.1 at/gQZ/yr
† 10Be/9Be blank ratio: 1.82x10-15 +-30.3%
§ Standards (nominal 10Be/9Be values): KN01-6-2 (5.35x10-13), KN01-5-3 (6.320x10-12)

## Sheet: S7 calculations
Table S7. Weathering calculations using mixing model
Sample	TDC	± TDC	Csilicate	± Csilicate	Ccarbonate	± Ccarbonate	Ccyclic	± Ccyclic	Chotspring	± Chotspring	SO4sulfide	± SO4sulfide	Fcarb	± Fcarb	Fsulf	± Fsulf	CO2 change	± CO2 change
	(µmol/L)	(µmol/L)	(µmol/L)	(µmol/L)	(µmol/L)	(µmol/L)	(µmol/L)	(µmol/L)	(µmol/L)	(µmol/L)	(µmol/L)	(µmol/L)					(µmol/L)	(µmol/L)
S18-01	1220	62.8662	141.769	84.7992	923.064	59.8202	0.413834	9.37625	162.006	51.5809	458.849	34.8092	0.903216	0.0887235	0.448982	0.0757565	359.938	57.6609
S18-02	1190.29	58.6012	231.699	88.29	851.829	55.0023	11.3049	8.07102	95.4527	26.6044	281.19	30.1141	0.812101	0.0888646	0.268076	0.0621116	84.0991	80.4276
S18-03	2766.93	123.479	2042.82	555.198	519.483	145.038	175.526	50.7455	48.9348	163.384	235.809	210.979	0.215664	0.0769861	0.0978963	0.176525	-1653.47	557.272
S18-04	544.117	24.7964	156.761	43.4417	345.86	22.2936	0.45049	2.45215	41.0443	9.48137	120.898	7.65548	0.72593	0.0827452	0.253755	0.0400228	-9.67848	39.594
S18-05	993.296	54.3919	119.855	28.4665	834.688	53.3078	0.733151	2.20652	38.0194	8.63248	93.8699	6.94571	0.905891	0.0812199	0.101877	0.0163828	7.15749	23.837
S18-06	948.446	47.774	226.874	48.397	712.505	45.5447	9.23618	3.48002	0.0468752	12.7755	195.612	14.4743	0.801244	0.0774585	0.219974	0.0362528	18.8687	47.8989
S18-07	1336.46	62.4763	498.873	124.761	830.871	53.321	5.32457	1.76641	1.38885	5.20877	294.97	15.8251	0.649997	0.0799902	0.230757	0.0346437	-152.428	124.191
S18-08	337.968	17.2691	79.4396	27.6484	240.829	16.3793	3.26521	1.90631	14.4346	7.14559	6.1048	6.04041	0.823805	0.0841961	0.0208828	0.0413557	-45.4034	16.2966
S18-09	1945.84	82.4744	1079.6	295.167	753.227	95.1671	16.713	10.2901	96.3017	30.2212	86.9623	32.5196	0.446629	0.0939143	0.0515646	0.0395272	-846.282	268.987
S18-11	1734.97	81.1612	1182.31	353.431	528.714	112.001	3.12857	1.27299	27.9753	4.99102	41.0808	7.07668	0.316358	0.09684	0.0245809	0.0100609	-1101.46	351.975
S18-12	594.556	24.0248	394.042	105.082	141.768	29.891	3.12591	5.5696	63.153	20.1582	5.13435	16.0203	0.300817	0.0870544	0.0108946	0.0680212	-324.374	89.9455
S18-13	178.945	9.5757	141.278	27.4449	2.73867	6.07235	5.72401	2.0302	33.8492	6.6315	0	8.5629	0.0268555	0.0597029	0	0	-99.2394	17.5174
S18-14	289.03	13.6315	184.715	55.0485	80.8062	12.0976	21.4054	6.44587	2.1035	11.9364	0	25.8636	0.404979	0.0895409	0	0	-118.726	39.7051
S18-16	798.165	34.8098	423.107	122.754	350.264	39.9232	4.43173	2.27003	20.3621	6.1236	20.0436	7.51027	0.486284	0.098834	0.0278272	0.0213728	-349.98	114.689
S18-17	748.506	31.4615	421.903	112.613	289.566	36.2719	12.3284	6.92872	24.7084	24.5222	23.4635	22.2844	0.451768	0.0922856	0.0366067	0.0697846	-327.932	99.3893
S18-18	755.325	32.1944	452.016	124.927	286.817	38.6712	3.72211	2.00401	12.7699	7.01093	26.6487	6.47758	0.422251	0.0951758	0.0392322	0.0203465	-365.791	116.62
S18-19	718.777	32.7738	392.695	68.4528	329.124	27.992	0.000125875	6.93441e-05	1.57866e-08	1.09139e-06	32.9043	0.610634	0.480237	0.0649506	0.048012	0.00535409	-323.308	66.4131
S18-20	394.96	17.6922	200.642	59.762	195.242	20.9114	0.000143634	7.00614e-05	1.61867e-08	8.03068e-06	20.6034	0.535825	0.528076	0.102455	0.0557263	0.0094695	-153.878	56.0391
S18-21	158.79	6.56484	82.6263	16.0025	76.281	5.54063	0.000147288	4.27673e-05	2.27099e-05	1.17897e-05	0	0.000191605	0.58758	0.0643735	0	0	-53.5414	9.09271
S18-22	376.983	16.0672	196.717	47.7174	166.24	16.2583	6.78656	3.10164	7.23964	8.05908	7.08583	10.4296	0.53939	0.0811185	0.022991	0.0677314	-134.875	32.9276
S18-23	782.326	34.9559	397.014	104.485	378.322	39.8071	6.76721	2.30581	0.233933	5.99129	52.2415	9.46847	0.524518	0.0947499	0.0724294	0.028327	-290.712	98.5976
S18-24	279.254	13.4232	151.918	42.8489	121.221	11.8206	6.1722	1.06546	0.0121948	2.31428	3.0007	6.41568	0.557849	0.0861607	0.013809	0.059072	-93.0791	24.0598
S18-25	204.895	9.15511	71.8202	16.5535	127.998	7.71062	5.18205	0.710902	9.94303e-05	0.509648	1.89952	5.10116	0.739685	0.0673821	0.010977	0.0589625	-43.1465	10.3148
S18-26	271.482	11.9298	82.5491	24.9973	180.012	10.762	7.1076	2.20252	1.81359	5.6351	38.9091	8.76033	0.774086	0.0738998	0.167317	0.0763646	-13.6265	16.14
S18-27	1500.08	71.6168	1101.67	340.244	383.859	105.729	6.03299	2.00901	8.51591	7.17946	87.104	8.10976	0.263178	0.096806	0.0597194	0.0183204	-987.592	339.606
S18-28	150.328	6.29486	49.4006	41.3805	56.6785	8.87043	0.0662012	1.99822	71.3987	10.5568	34.5248	9.40202	0.612755	0.190226	0.37325	0.226587	-1.29448	24.9944
S18-29	225.283	9.5427	26.4689	43.9345	149.408	9.37044	0.748177	2.41305	74.3568	10.1387	53.6932	10.3375	0.896436	0.144994	0.322154	0.133022	36.4323	25.2293
S18-30	213.721	9.28061	82.4851	24.1108	125.298	8.2166	6.06814	2.11868	0.000351511	3.66655	15.1204	7.83869	0.700364	0.0762501	0.0845164	0.0879371	-38.4858	15.3518
S18-31	548.831	25.3737	158.012	76.3336	309.636	24.2284	7.28691	5.13992	90.2475	16.6921	44.7753	18.1508	0.744528	0.104135	0.107664	0.088176	-61.4706	45.464
S18-32	503.094	26.6809	49.155	62.5359	379.453	27.6865	0.0775566	3.10069	112.25	16.3871	72.845	14.8701	0.909866	0.118877	0.17467	0.0737819	35.2551	38.6987
S18-33	877.906	43.9219	264.648	54.5154	597.03	44.8987	8.31909	2.62384	7.90872	8.87509	294.991	10.8098	0.737559	0.0827919	0.364426	0.0404432	82.5536	51.4922
S18-34	834.351	41.9723	247.89	0	587.778	0	0.000130614	0	2.83949e-07	0	268.449	NaN	0.75027	0	0.342662	0	72.8045	0
S18-35	1930.11	92.8001	621.543	102.273	1301.05	87.5674	4.87754	1.60638	2.63743	5.95722	732.438	8.38954	0.738069	0.0740651	0.415502	0.0323583	270.713	98.0695
S18-36	1359.32	70.7278	325.92	71.4991	1023.03	68.2301	4.90659	1.86723	5.45873	7.32658	581.03	8.12181	0.795579	0.0801174	0.451848	0.036358	318.166	69.4567
S18-37	785.093	41.4863	166.871	22.0215	619.392	39.7693	0.000121593	3.34922e-05	9.7091e-07	3.93167e-05	191.963	2.58429	0.854342	0.0741712	0.264779	0.0170357	86.3622	14.8272

## Sheet: S8 calculations forward
Table S8. Weathering calculations using forward model
Sample	Csilicate	± Csilicate	Ccarbonate	± Ccarbonate	Ccyclic	± Ccyclic	SO4sulfide	± SO4sulfide	Fcarb	± Fcarb	Fsulf	± Fsulf	CO2 change	± CO2 change
	(µmol/L)	(µmol/L)	(µmol/L)	(µmol/L)	(µmol/L)	(µmol/L)	(µmol/L)	(µmol/L)					(µmol/L)	(µmol/L)
S18-01	323.642	43.2	868.506	74.8723	31.17	8.97026	422.342	35.0062	0.903216	0.0887235	0.448982	0.0757565	196.96	54.6203
S18-02	349.968	84.2508	818.464	102.335	24.4561	7.0352	269.843	27.5864	0.812101	0.0888646	0.268076	0.0621116	-11.4505	88.4262
S18-03	990.888	120.614	1614.92	175.5	180.313	51.8577	234.392	170.094	0.215664	0.0769861	0.0978963	0.176525	-586.466	207.125
S18-04	207.916	49.4412	330.055	55.0041	6.87731	1.97902	114.341	6.56497	0.72593	0.0827452	0.253755	0.0400228	-52.7771	49.7338
S18-05	185.568	36.4449	802.067	65.1336	6.33437	1.83563	88.3673	6.03796	0.905891	0.0812199	0.101877	0.0163828	-50.7041	36.6997
S18-06	228.722	51.2044	710.957	69.6804	9.81042	2.82638	194.625	11.7134	0.801244	0.0774585	0.219974	0.0362528	16.382	52.3251
S18-07	347.034	96.6808	984.614	114.826	5.3801	1.57867	294.859	15.1996	0.649997	0.0799902	0.230757	0.0346437	0.100219	97.7382
S18-08	104.817	16.7494	227.986	23.2161	5.78095	1.66911	3.28511	5.44762	0.823805	0.0841961	0.0208828	0.0413557	-68.2074	17.1555
S18-09	992.253	114.531	928.666	137.019	27.8877	9.12216	78.367	28.22	0.446629	0.0939143	0.0515646	0.0395272	-732.992	115.993
S18-11	264.33	31.3333	1465.96	86.495	5.2395	1.51234	40.9337	6.69199	0.316358	0.09684	0.0245809	0.0100609	-177.562	31.5107
S18-12	465.205	54.9864	116.522	57.7541	14.3559	4.12957	0	13.422	0.300817	0.0870544	0.0108946	0.0680212	-381.412	55.6611
S18-13	171.6	27.6345	NaN	26.5185	8.21897	2.36544	0	7.69853	0.0268555	0.0597029	0	0	-120.387	27.6387
S18-14	205.257	31.3601	65.5835	30.5703	20.3549	5.86011	0	19.0255	0.404979	0.0895409	0	0	-137.448	35.2873
S18-16	343.543	40.5006	448.742	52.0125	6.57967	1.898	18.6004	6.18518	0.486284	0.098834	0.0278272	0.0213728	-264.759	40.2772
S18-17	445.254	51.8321	287.643	58.7289	17.4674	5.02856	17.6139	16.9896	0.451768	0.0922856	0.0366067	0.0697846	-347.579	53.6748
S18-18	363.861	42.6621	386.521	51.8889	5.53117	1.62315	24.9357	5.27579	0.422251	0.0951758	0.0392322	0.0203465	-274.559	42.2542
S18-19	200.227	23.8745	518.55	39.9095	0.000159083	0.000116767	32.9043	0.610634	0.480237	0.0649506	0.048012	0.00535409	-133.066	23.4757
S18-20	146.526	17.3868	248.435	24.2496	0.000159083	0.000116767	20.6033	0.535825	0.528076	0.102455	0.0557263	0.0094695	-100.619	17.0986
S18-21	85.822	12.4757	72.9675	12.7217	0.000159083	0.000116767	0	0.000320801	0.58758	0.0643735	0	0	-56.7231	11.9082
S18-22	221.567	27.9088	148.897	30.4881	7.29611	2.0985	7.07783	6.84607	0.53939	0.0811185	0.022991	0.0677314	-156.891	27.9979
S18-23	268.794	30.1214	507.51	45.1308	6.73971	1.94706	52.3348	7.24823	0.524518	0.0947499	0.0724294	0.028327	-161.987	30.3946
S18-24	162.662	24.3607	112.039	23.7185	5.09591	1.47973	5.0073	4.82759	0.557849	0.0861607	0.013809	0.059072	-101.425	23.1695
S18-25	78.2557	11.3834	121.746	13.0688	5.47583	1.57564	1.38471	5.14998	0.739685	0.0673821	0.010977	0.0589625	-49.8498	11.8002
S18-26	97.7117	16.0136	166.718	18.5259	7.89178	2.27349	38.0421	7.41354	0.774086	0.0738998	0.167317	0.0763646	-28.6068	16.992
S18-27	171.399	20.2063	1322.26	74.2115	7.19201	2.93064	86.3973	8.54287	0.263178	0.096806	0.0597194	0.0183204	-54.8556	21.6093
S18-28	72.0075	11.4973	73.2099	11.9977	5.71933	1.65143	33.6136	5.40479	0.612755	0.190226	0.37325	0.226587	-15.1356	12.2466
S18-29	61.4289	9.04562	157.961	12.4984	6.59432	1.90145	52.8536	6.22019	0.896436	0.144994	0.322154	0.133022	12.1587	10.629
S18-30	91.9109	15.1248	115.868	16.3088	6.64907	1.9144	14.1894	6.23956	0.700364	0.0762501	0.0845164	0.0879371	-48.558	15.7495
S18-31	228.496	34.8932	306.888	41.1055	15.0472	4.32778	42.4073	14.0969	0.744528	0.104135	0.107664	0.088176	-111.547	36.6772
S18-32	86.1717	11.9309	408.981	28.9083	8.88726	2.55697	71.7613	8.36908	0.909866	0.118877	0.17467	0.0737819	15.1707	14.2519
S18-33	165.193	14.5982	704.916	45.6318	8.72482	2.51066	295.049	8.66599	0.737559	0.0827919	0.364426	0.0404432	185.286	16.2318
S18-34	141.869	10.9031	692.482	42.6934	0.000159083	0.000116767	268.449	2.52642	0.75027	NaN	0.342662	0	177.743	10.1772
S18-35	459.29	30.3288	1466.28	94.2257	5.07722	1.46966	732.478	7.32677	0.738069	0.0740651	0.415502	0.0323583	434.213	26.9776
S18-36	216.607	16.7634	1137.3	72.0551	6.05429	1.75375	579.7	7.20225	0.795579	0.0801174	0.451848	0.036358	428.337	17.2477
S18-37	187.169	15.1239	597.924	43.2261	0.000159083	0.000116767	191.963	2.58429	0.854342	0.0741712	0.264779	0.0170357	66.5105	14.3145
